# Supplementary material for: The human Na+/H+ exchanger 1 is a membrane scaffold protein for extracellular signal-regulated kinase 2
Source: PubMed Central journal article supplement (PMC4833948; doi:10.1186/s12915-016-0252-7), 2016-04-15

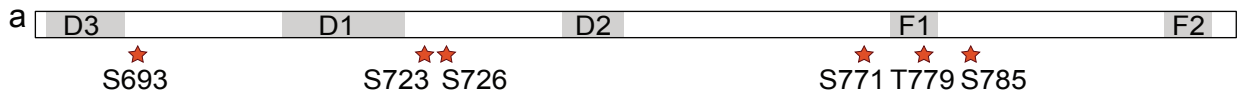

**b - Effect of S693A and T779A mutations on phosphorylation kinetics**

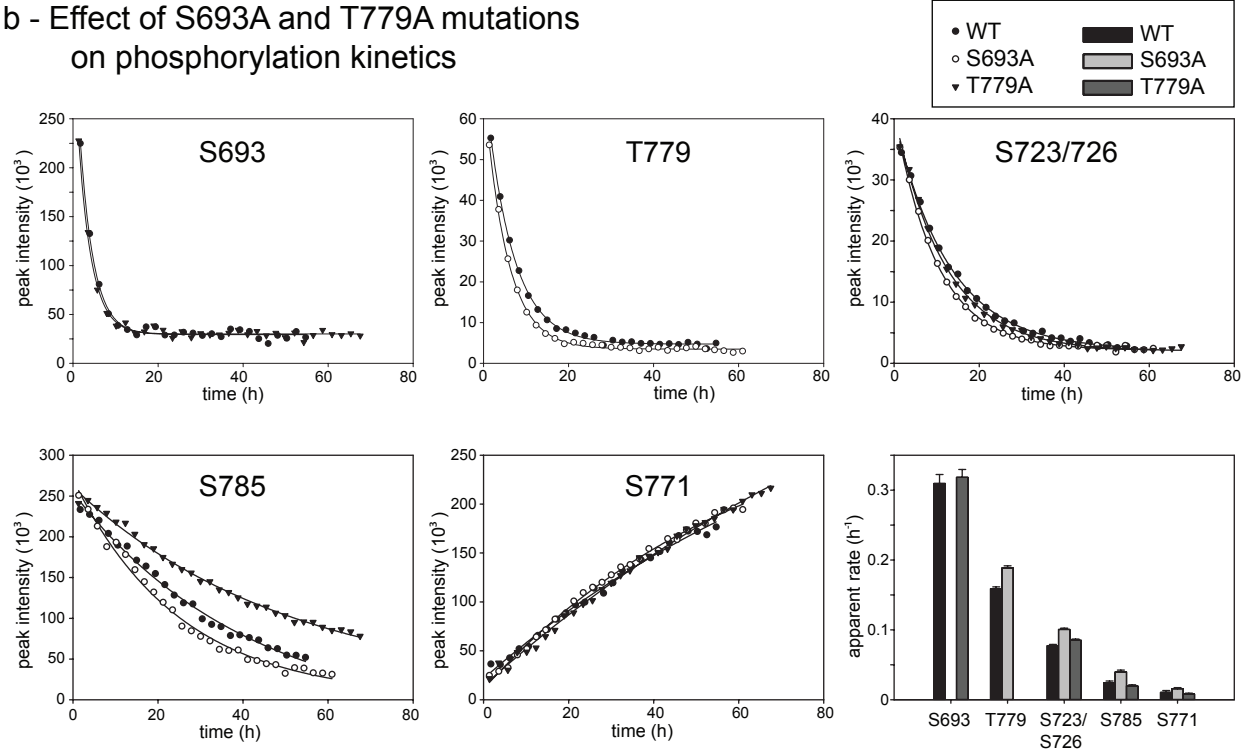

**c - Effect of D-domain and F-site mutations on phosphorylation kinetics**

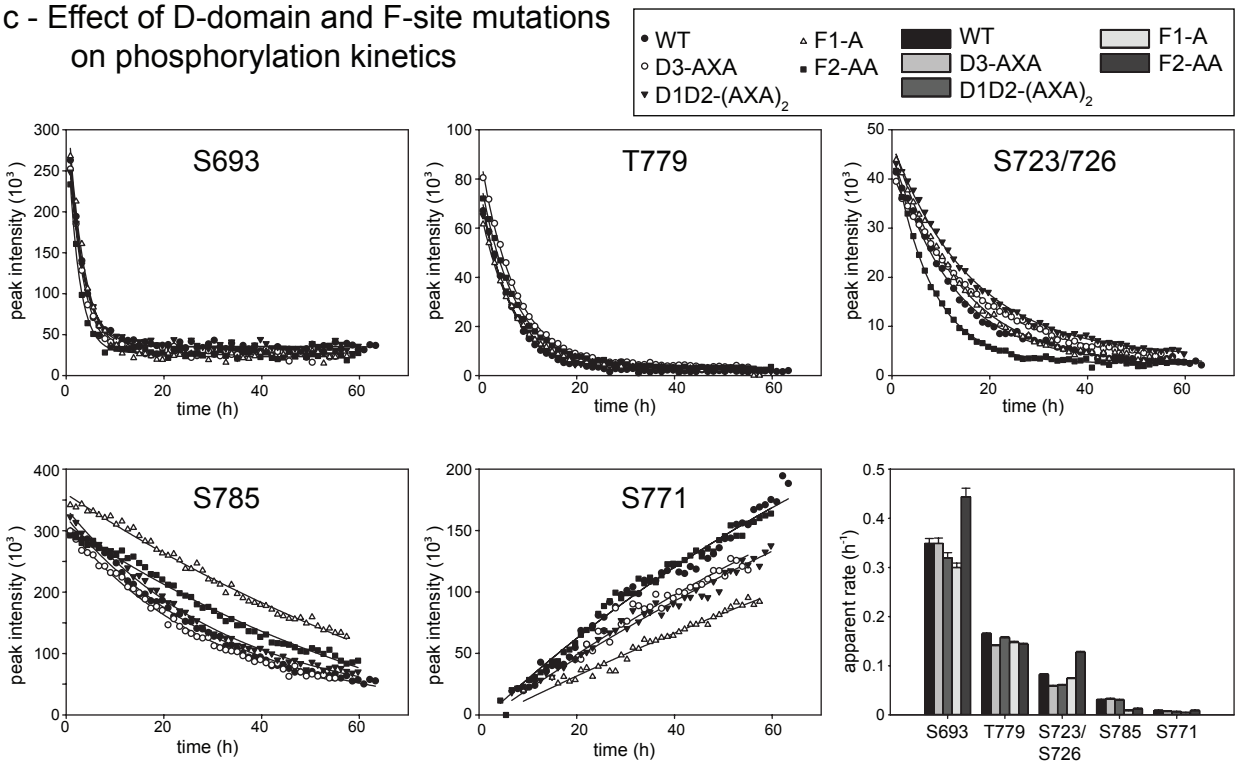

Supplement: 12915_2016_252_MOESM5_ESM.pdf [file 12915_2016_252_MOESM5_ESM.pdf]
